# Supplementary material for: Anti-Inflammatory Activity of Four Triterpenoids Isolated from Poriae Cutis
Source: MDPI journal article supplement (doi:10.3390/foods10123155), 2021-12-20
Supplement: s1 [file s1]

## Supplementary informations

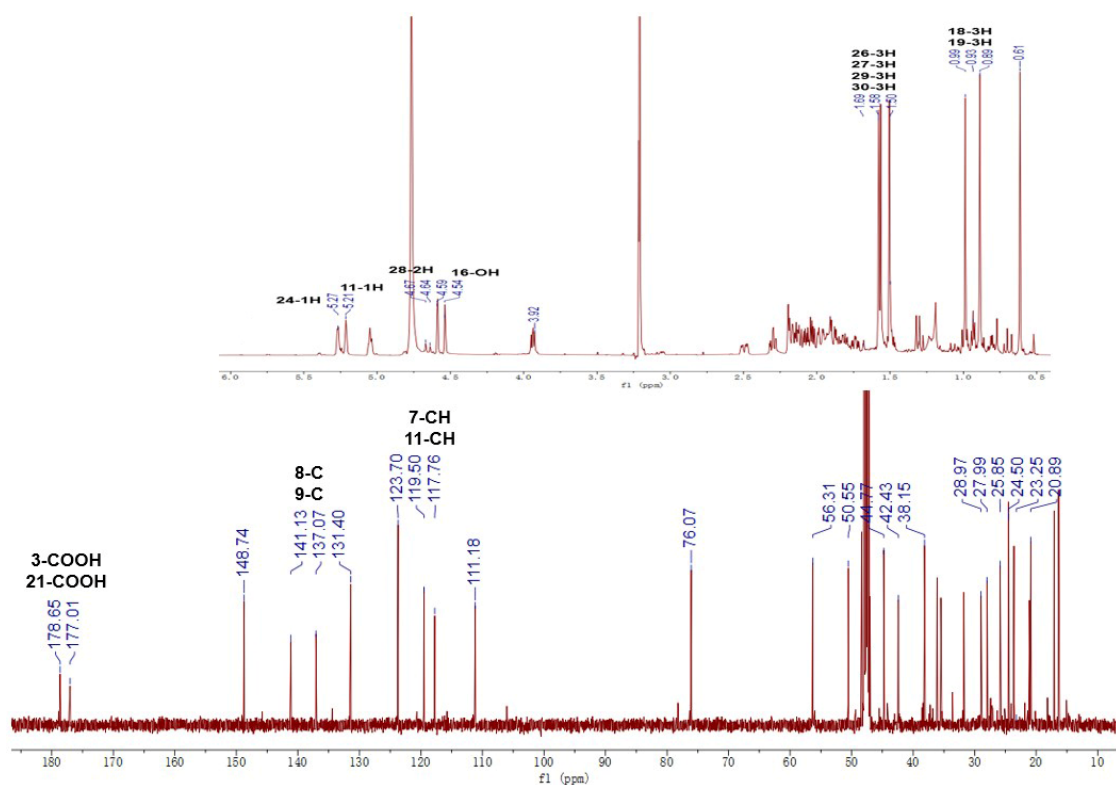

Figure S1.  $^1\text{H}$ - and  $^{13}\text{C}$ -NMR spectra of compound 1.

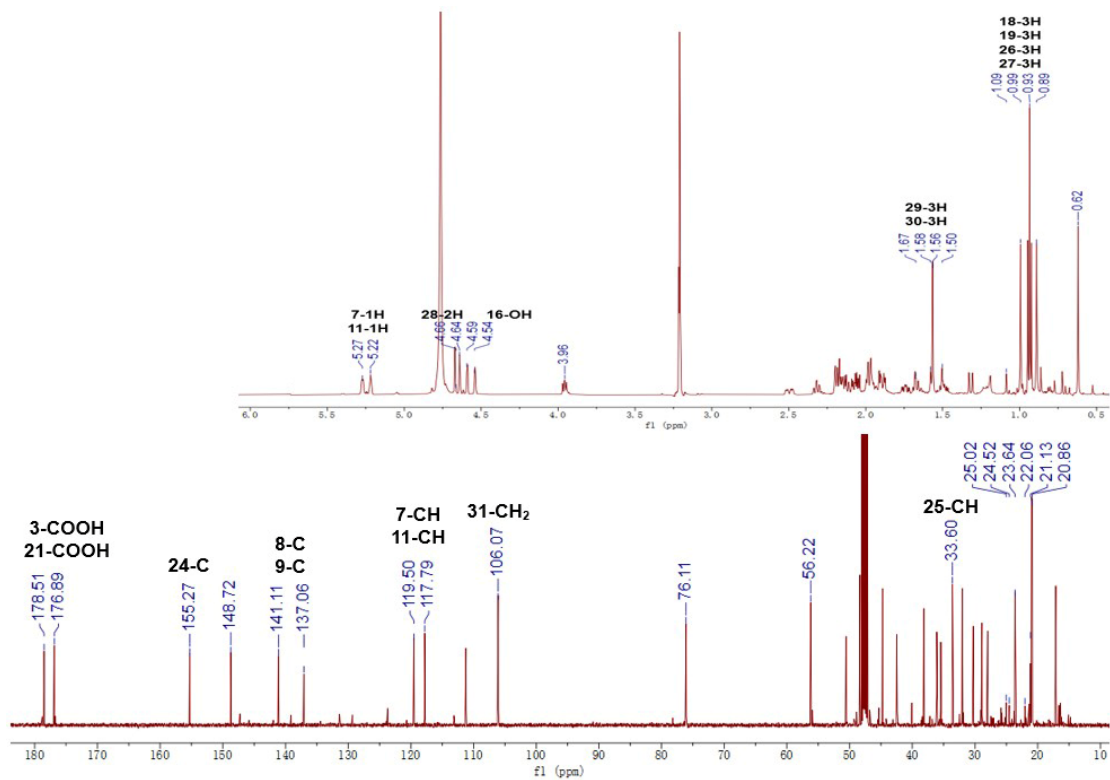

Figure S2.  $^1\text{H}$ - and  $^{13}\text{C}$ -NMR spectra of compound 2.

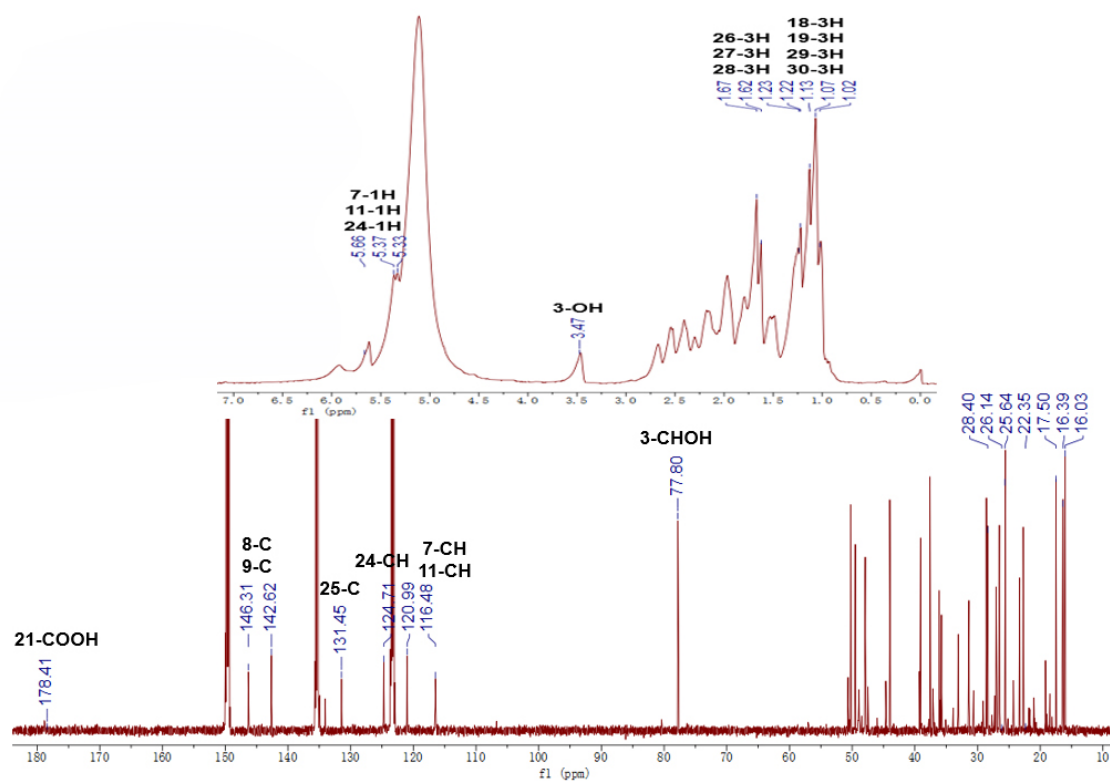

Figure S3.  $^1\text{H}$ - and  $^{13}\text{C}$ -NMR spectra of compound 3.

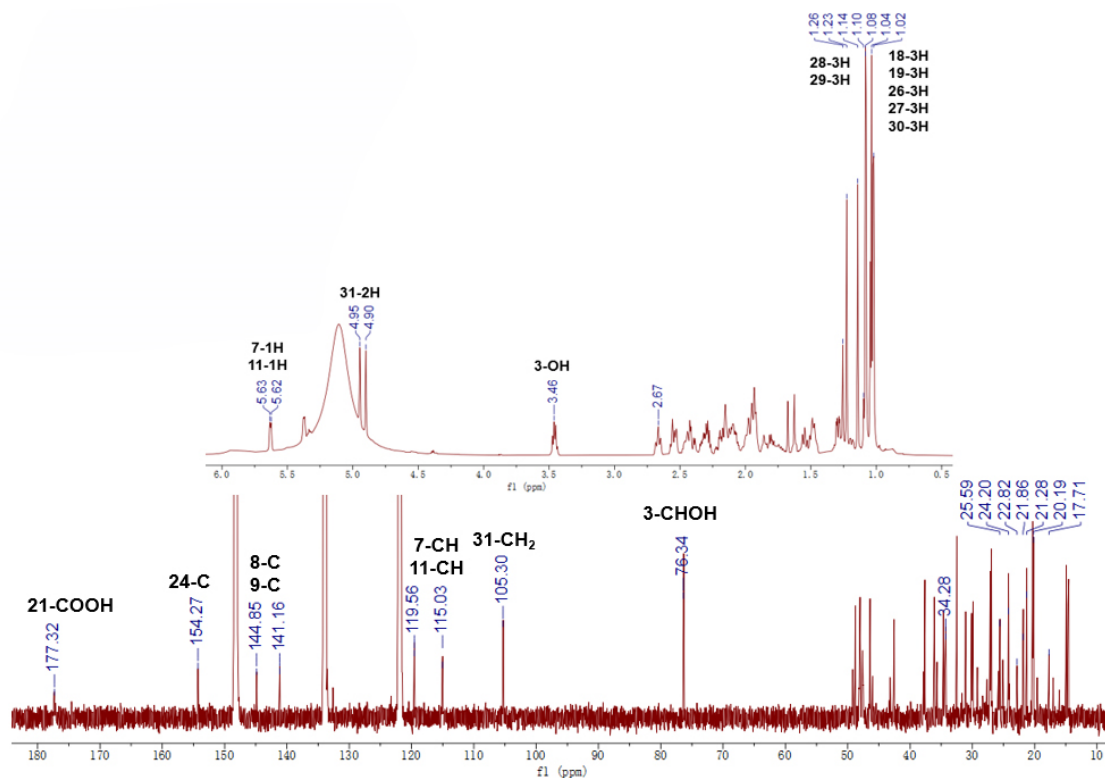

Figure S4.  $^1\text{H}$ - and  $^{13}\text{C}$ -NMR spectra of compound 4.
